# Supplementary material
Source: PubMed Central journal article supplement (PMC5730055)
Supplement: NIHMS925806-supplement-Supplemental_Data.pdf [file NIHMS925806-supplement-Supplemental_Data.pdf]

***New phytologist* supporting information**

Article title: **Silencing of *AtRAP*, a target gene of a bacteria-induced small RNA, triggers antibacterial defense responses through activation of *LSU2* and down-regulation of *GLK1***

Authors: Huan Wang, Jang-Kyun Seo, Shang Gao, Xiping Cui and Hailing Jin

Article acceptance date: 28 April 2017

The following Supporting Information is available for this article:

**Fig. S1** *AtRAP* negatively regulates plant defense to *Pst*.

**Fig. S2** Phenotype of *AtRAP* overexpressing plants.

**Fig. S3** *LSU2* is negatively regulated by *AtRAP*.

**Fig. S4** Characterization of the *atrap lsu2* double mutant.

**Fig. S5** *GLK1* is positively regulated by *AtRAP*.

**Fig. S6** A hypothetical working model for the regulation of the *AtRAP* protein in plant antibacterial disease resistance.

**Table. S1** Q-PCR primers used in this study.

**Table. S2** DNA probes used in this study.

**Table. S3** Genes down-regulated in the *atrap* mutant.

**Table. S4** Genes up-regulated in the *atrap* mutant.

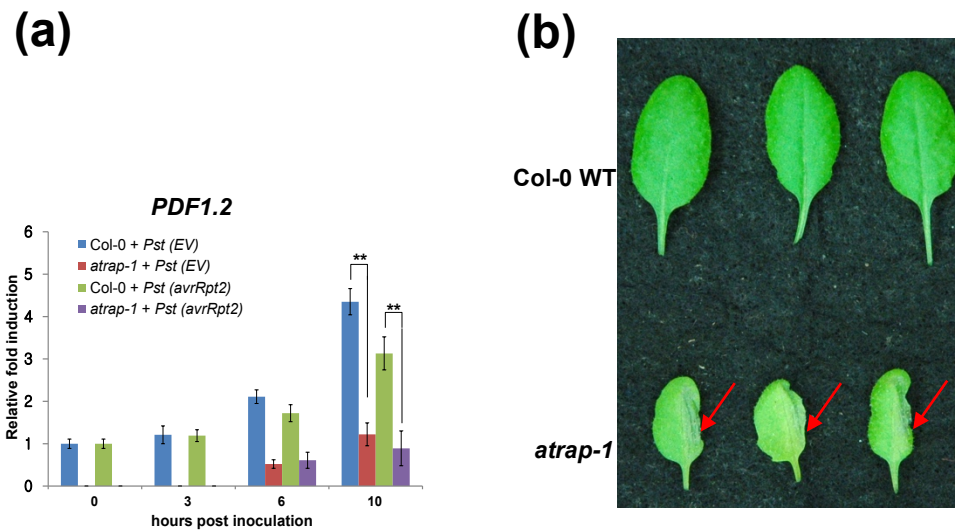

**Fig. S1** AtRAP negatively regulates plant defense to *Pst*. (a) Five-week-old *Arabidopsis* Col-0 WT and the *atrap* mutant plants were infiltrated with *Pst* (EV) or *Pst* (*avrRpt2*) at a concentration of  $2 \times 10^7$  cfu/mL. Total RNAs were extracted from the infiltrated leaves at the times indicated on the horizontal axes. Relative accumulation levels of *PDF1.2* transcripts were quantified by quantitative real-time PCR. Error bars represent the SEM from three independent experiments. \*\*  $p < 0.01$  (determined by Student's t test). (b) HR cell death phenotypes in the leaves of *Arabidopsis* Col-0 WT and the *atrap* mutant plants. The leaves were infiltrated with *Pst* (*avrRpt2*) at a concentration of  $2 \times 10^7$  cfu/mL at 8 hours post inoculation (hpi). The red arrowheads indicate collapse of infiltrated leaf areas caused by HR cell death.

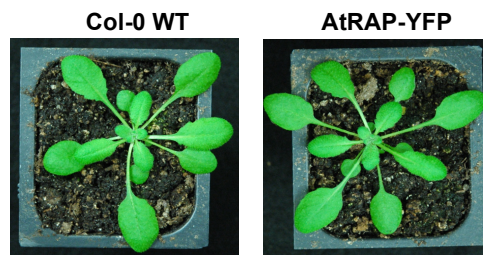

**Fig. S2** Phenotype of AtRAP overexpressing plants. 35S::AtRAP-YFP was transformed into the *atrap-1* mutant background. The virescent phenotype and the growth retardation defects of *atrap-1* were complemented.

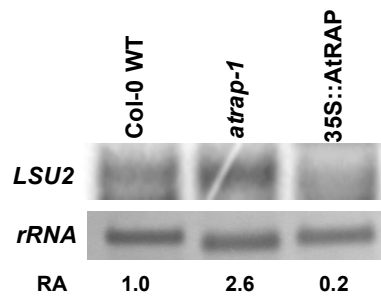

**Fig. S3** *LSU2* is negatively regulated by *AtRAP*. Detection of *LSU2* mRNA in the Col-0 WT, the *atrap* mutant and the 35S::AtRAP plants. Five-week-old *Arabidopsis* Col-0 WT, the *atrap* mutant and the 35S::AtRAP plants were collected. Total RNAs were extracted and subjected to Northern blot analysis.

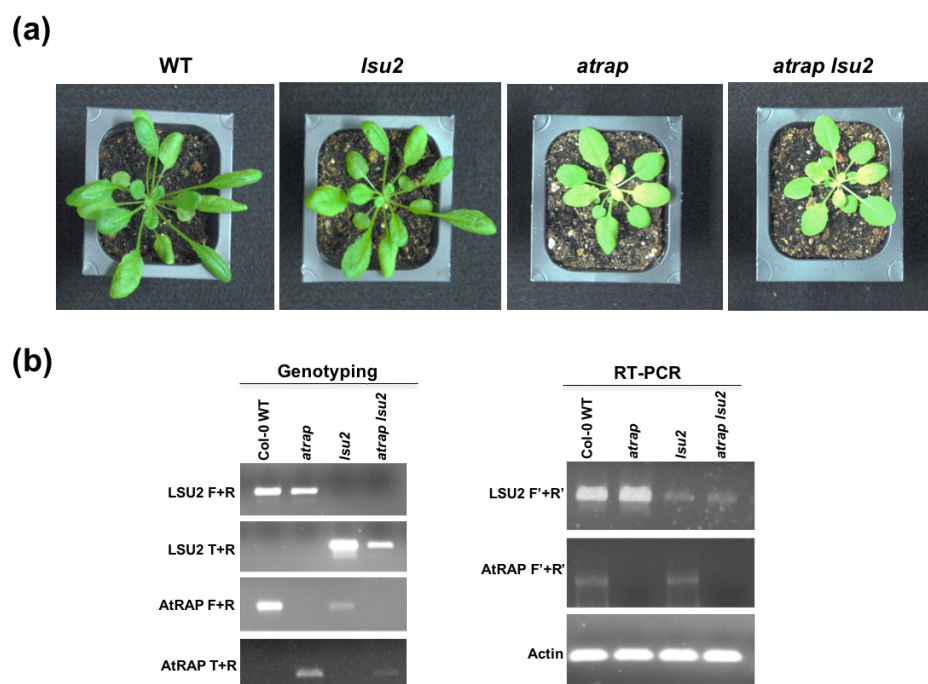

**Fig. S4** Characterization of the *atrap lsu2* double mutant. (a) Phenotype of the *atrap lsu2* double mutant. (b) Genotyping and RT-PCR result of the *atrap lsu2* double mutant. F: Genomic DNA forward primer across T-DNA insertion site; R: Genomic DNA reverse primer across T-DNA insertion site; T: T-DNA insertion primer; F': cDNA forward primer; R': cDNA reverse primer. The primers follow previous publication (Katiyar-Agarwal *et al.*, 2006; Ruckle *et al.*, 2012). The *lsu2* T-DNA insertion line (SALK\_031648) is a knock-down line within 5' UTR insertion. The double mutant was selected by PCR of the genomic DNA for the homologous T-DNA insertion and confirmed by RT-PCR to show no or very low expression of *AtRAP* and *LSU2*, respectively, in the double mutant.

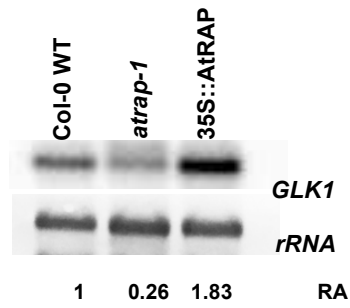

**Fig. S5** *GLK1* is positively regulated by *AtRAP*. Detection of *GLK1* mRNA in the Col-0 WT, the *atrap* mutant and the 35S::AtRAP plants. Five-week-old *Arabidopsis* Col-0 WT, the *atrap* mutant and the 35S::AtRAP plants were collected. Total RNAs were extracted and subjected to Northern blot analysis.

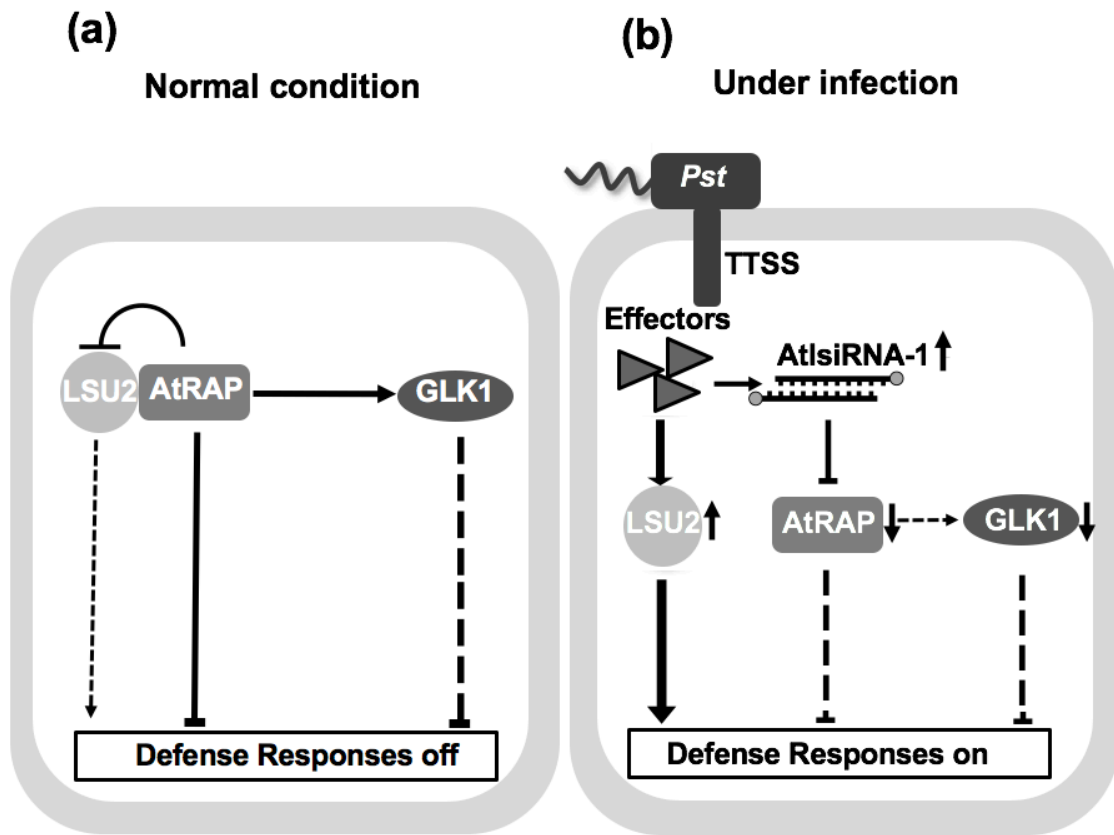

Fig. S6 A hypothetical working model for the regulation of the AtRAP protein in plant antibacterial disease resistance. Under the normal growth condition in the absence of pathogen infection, AtRAP suppresses the positive regulator of plant defense - LSU2 by directly interacting with the LSU2 protein. Upon bacterial infection, AtlsiRNA1 is highly induced and silences the *AtRAP* gene, which quickly activates defense responses by releasing LSU2. Expression of the transcription factor GLK1 is positively regulated by AtRAP protein and acts as a negative regulator of plant antibacterial defense responses.

Table S1. Q-PCR primers used in this study.

| <b>Primer ID</b>               | <b>Primer sequence</b> |
|--------------------------------|------------------------|
| PR1<br>(AT2G14610)-<br>QRT-F   | TTCCCTCGAAAGCTCAAGATA  |
| PR1<br>(AT2G14610)-<br>QRT-R   | GGCACATCCGAGTCTCACTGA  |
| PR2<br>(AT3G57260)-<br>QRT-F   | GGCTTGAAGTCAAGGTCTCA   |
| PR2<br>(AT3G57260)-<br>QRT-R   | CCCTGGATCGTTATCAACAG   |
| RBOHd<br>(AT5G47910)-<br>QRT-F | TGCTTTCAGATCAAGCATCA   |
| RBOHd<br>(AT5G47910)-<br>QRT-R | TGAGCTTACGTGTCCAGTCA   |
| RBOHf<br>(AT1G64060)-<br>QRT-F | ACACCGAGGCATACGTGTAA   |
| RBOHf<br>(AT1G64060)-<br>QRT-R | ACATGGACCTTATCAACGCA   |
| PDF1.2<br>(AT5G44420)<br>QRT-F | TCATCATGGCTAAGTTTGCT   |
| PDF1.2<br>(AT5G44420)<br>QRT-R | CCTTCAAGGTTAATGCACTG   |



Table S2. DNA probes used in this study.

| <b>Primer ID</b>              | <b>Primer sequence</b>                  |
|-------------------------------|-----------------------------------------|
| LSU2<br>(AT5G24660)<br>Probe1 | ATCTCTTTCTTCATCTCCTCCACAGCTTTCTCCATCTCT |
| LSU2<br>(AT5G24660)<br>Probe2 | AGCCGCCACCGTCACATAGTTTCCTCCTTTCCCCATTT  |
| GLK1<br>(AT2G20570)<br>Probe1 | AAACGGCGGATTAGGCATGGCGGTAGAAGGCGGAGGTA  |
| GLK1<br>(AT2G20570)<br>Probe2 | CGTCATAAGTCACCGTCTCCGCCGCAACATCGTCTCT   |

Table S3. Genes down-regulated in the *atrap* mutant.

| <b>Affymetrix code</b> | <b>Relative level (WT/<i>atrap-1</i>)</b> | <b>AGI code</b> | <b>Gene description</b>                                           |
|------------------------|-------------------------------------------|-----------------|-------------------------------------------------------------------|
| 254716 at              | 0.1347                                    | AT4G13560       | UNE15 (unfertilized embryo sac 15)                                |
| 250824 at              | 0.1462                                    | AT5G05200       | Protein kinase superfamily protein                                |
| 262357 at              | 0.3179                                    | AT1G73040       | jacalin lectin family protein                                     |
| 260869 at              | 0.3228                                    | AT1G43800       | acyl-(acyl-carrier-protein) desaturase                            |
| 265948 at              | 0.3668                                    | AT2G19590       | ACC oxidase 1                                                     |
| 260004 at              | 0.4208                                    | AT1G67860       | unknown protein                                                   |
| 252612 at              | 0.4555                                    | AT3G45160       | unknown protein                                                   |
| 254386 at              | 0.4634                                    | AT4G21960       | PRXR1 (Peroxidase superfamily protein)                            |
| 263715_at              | 0.4643                                    | AT2G20570       | GLK1 (ARABIDOPSIS GOLDEN2-LIKE 1)                                 |
| 255626 at              | 0.4983                                    | AT4G00780       | TRAF-like family protein                                          |
| 245196 at              | 0.5058                                    | AT1G67750       | pectate lyase family protein                                      |
| 259001 at              | 0.5220                                    | AT3G01960       | unknown protein                                                   |
| 259535_at              | 0.5271                                    | AT1G12280       | disease resistance protein (CC-NBS-LRR class)                     |
| 262958 at              | 0.5329                                    | AT1G54410       | dehydrin family protein                                           |
| 264611 at              | 0.5543                                    | AT1G04680       | pectate lyase family protein                                      |
| 262582 at              | 0.5608                                    | AT1G15410       | aspartate-glutamate racemase family                               |
| 245307_at              | 0.5688                                    | AT4G16770       | 2-oxoglutarate and Fe(II)-dependent oxygenase superfamily protein |
| 255578 at              | 0.5757                                    | AT4G01450       | nodulin MtN21 family protein                                      |
| 247685 at              | 0.5917                                    | AT5G59680       | leucine-rich repeat protein kinase                                |
| 246595_at              | 0.5983                                    | AT5G14780       | Encodes a NAD-dependent formate dehydrogenase                     |
| 261368 at              | 0.6011                                    | AT1G53070       | legume lectin family protein                                      |

Table S4. Genes up-regulated in the *atrap* mutant.

| <b>Affimetrix code</b> | <b>Relative level (WT/<i>atrap-1</i>)</b> | <b>AGI code</b> | <b>Gene description</b>                          |
|------------------------|-------------------------------------------|-----------------|--------------------------------------------------|
| 253208_at              | 1.5466                                    | AT4G34830       | MRL1 (Pentatricopeptide repeat protein)          |
| 264698_at              | 1.8240                                    | AT1G70200       | RNA-binding (RRM)-containing protein             |
| 251638_at              | 1.9411                                    | AT3G57490       | RPS2D (40S ribosomal protein S2)                 |
| 254907_at              | 2.3464                                    | AT4G11190       | disease resistance-responsive family protein     |
| 246411_at              | 2.3464                                    | AT1G57770       | FAD/NAD(P)-binding oxidoreductase family protein |
| 244997_at              | 2.6193                                    | ATCG00170       | RNA polymerase beta' subunit-2                   |
| 249645_at              | 2.9723                                    | AT5G36910       | thionin 2.2                                      |

## Reference

**Katiyar-Agarwal S, Morgan R, Dahlbeck D, Borsani O, Villegas A, Jr., Zhu JK, Staskawicz**

**BJ, Jin H. 2006.** A pathogen-inducible endogenous siRNA in plant immunity. *Proc Natl Acad Sci U S A* **103**(47): 18002-18007.

**Ruckle ME, Burgoon LD, Lawrence LA, Sinkler CA, Larkin RM. 2012.** Plastids are major

regulators of light signaling in Arabidopsis. *Plant Physiol* **159**(1): 366-390.
